# Supplementary material for: Circular RNA Rap1b promotes Hoxa5 histone acetylation by recruiting Kat7 to inhibit neuronal apoptosis in acute ischemic stroke
Source: Research Square preprint supplement (doi:10.21203/rs.3.rs-1622225/v1), 2022-05-10
Supplement: Supplementary file 1 [file 0000247287fe64fffd615168.docx]

**Table S1.** **The primers of lin-Rap1b, CircRap1b, Hoxa5 mRNA, Fam3a mRNA in quantitative real-time PCR (qRT-PCR).**

| **Primers** | **Forward** | **Reverse** |
| --- | --- | --- |
| Lin-Rap1b | 5′-CACTTGGTCTAGCAGTGGCA-3′ | 5′-GCAGCAGAAAAGTGAGTGCC-3′ |
| circRap1b | 5′-TGGACACTGCAGGAACGACT-3′ | 5′-GCTGTGCATCTACTTCAACTTGCT-3′ |
| Hoxa5 | 5′-GTTCCGTGAGCGAGCAATTC-3′ | 5′-TCTTCGGCGTGTCAGGTAAC-3′ |
| Fam3a | 5′-CCCAGCCTTGTCCTGAAGAG-3′ | 5′-TCGAGGGATACAGCCTTCCA-3′ |
