# Supplementary material for: Circular RNA Rap1b promotes Hoxa5 histone acetylation by recruiting Kat7 to inhibit neuronal apoptosis in acute ischemic stroke
Source: Research Square preprint supplement (doi:10.21203/rs.3.rs-1622225/v1), 2022-05-10
Supplement: Supplementary file 2 [file 4cb958e3b90fb93ac9dd6560.docx]

**Table S4. The probes of circRap1b and Hoxa5 in Chromatin Isolation by RNA Purification (ChIRP).**

| **Probe** name | **Probe** sequence (5'-> 3') |
| --- | --- |
| circRap1b | 5′-CCTTGAACAAACTGTACAGT-3′ |

| **Probe** name | **Probe** sequence (5'-> 3') |
| --- | --- |
| circRap1b_tiling-1 | 5′-ACTGTACAGTTTGTTCAAGGAATTT-3′ |
| circRap1b_tiling-2 | 5′-CGTTCCTGCAGTGTCCAAGA-3′ |
| Hoxa5_tiling-1 | 5′-aaagagagggtgctgtgagt-3′ |
| Hoxa5_tiling-2 | 5′-caagttatgtgatccacctg-3′ |
| Hoxa5_tiling-3 | 5′-tgcttacattgtgtctgtga-3′ |
| Hoxa5_tiling-4 | 5′-cggttgaagtggaattcctt-3′ |
| Hoxa5_tiling-5 | 5′-agcttttgtgtagtgtttct-3′ |
