# Supplementary material for: Circular RNA Rap1b promotes Hoxa5 histone acetylation by recruiting Kat7 to inhibit neuronal apoptosis in acute ischemic stroke
Source: Research Square preprint supplement (doi:10.21203/rs.3.rs-1622225/v1), 2022-05-10
Supplement: Supplementary file 3 [file 802dd7f405ac68f800c4f431.docx]

**Materials and Methods**

**HT22 cell culture, AIS treatment**

The mouse hippocampal neuronal cell line HT22 was purchased from Procell Life Science & Technology Co, Ltd (Wuhan, China). The cells were cultured in DMEM (HyClone, USA) medium supplemented with 10% fetal bovine serum (FBS, Gibco, USA) in a cell humidified Calorstat with a condition of 37 °C, 5% CO2 and 95% air. HT22 cells were treated to acute ischemic (AIS), in brief, the culture medium was replaced by glucose-free medium and cells were cultured for 24 h in a tri-gas incubator (SANYO, Osaka, Japan) with a humidified condition of at 37 °C 3% O2 and 5% CO2. As normal, the previous culture medium was replaced by fresh DMEM medium for 24 h in a humidified condition of 37 °C, 95% air and 5% CO2.

**Permanent MCAO (pMCAO) models and experimental design**

The informed consent was signed by patients voluntarily, and animal experiments were received approval from the approved by the Ethics Committee of People's Hospital affiliated to China Medical University and China Medical University. pMCAO was processed according to a previous study 44 utilizing the adult male C57BL/6J mice of aged 12–14 weeks (weighing 24–30 g). The pMCAO models of within 24 h would to be investigated as acute ischemic stroke (AIS) models. The procedure of animal experiment following the ARRIVE guidelines. Mice were bred in a controlled temperature and humidity environment of 12h light/dark cycle with a standard mouse diet and water. To investigate the effect of AIS on hippocampal neurons in mice, AIS models would be randomly divided into two groups: Sham operation group and AIS group; to investigate the effect of circRap1b and Hoxa5 on hippocampal neuronal apoptosis, AIS models would be randomly divided to five groups: AIS group, AIS+*circRap1b*(+)NC+*Hoxa5*(+)NC, AIS+*circRap1b*(+)+*Hoxa5*(+)NC, AIS+*circRap1b*(+)NC+*Hoxa5*(+), AIS+*circRap1b*(+)+*Hoxa5*(+). *CircRap1b* and *Hoxa5* full-length plasmids and plasmid vectors were injected to AIS-induced mice through intra-cerebrao-ventricular (IVC) using in vivo transfection reagent DNA/RNA reagent (Engreen Biosystem Co., Ltd., China). The AIS models were constructed on the first day, and each mouse was injected with 2.0 μg/10 μl plasmids every 12 hours by the IVC injection after the operation to maintain the transfection effect in vivo.

**Microarray Analysis of Human** **circRNAs Expression Profile**

Sample preparation, microarray hybridization and the expression profile of circRNAs analysis were carried out with the help of Kangchen Biotech (Shanghai, P.R. China) utilizing an Agilent chip platform.

**Quantitative Real-Time PCR**

First, the total RNA in cells was extracted by Trizol, and the purity and concentration of RNA were detected by NanoDrop 2000 ultra-micro spectrophotometer. According to the instructions of the one-step Prime Script TM RT-PCR Kit (Takara, RR064A, Japan) was used to detect the expression of *Hoxa5* and Fam3a mRNA with β-actin as the internal reference. Three micrograms of total RNA were reverse transcribed to cDNA using RiboTM Reverse Transcription Kit and then the expression levels of lin-*Rap1b* and *circRap1b* were quantified using SYBR Premix Ex Taq II (Takara) and random primers and oligo dT primers with β-actin as the internal reference. The SYBR Premix Ex TaqII kit was used to detect the retrieval of Hoxa5 promoter region in the DNA precipitated by H3K14ac, and it was calculated with input as the standard. The relative expression levels of lin-*Rap1b*, *CircRap1b*, *Hoxa5* and *Fam3a* mRNA and *Hoxa5* promoter region retrieval were calculated as 2-ΔΔCt. The primers are listed in Table S1.

**Western Blot**

Firstly, prepare the protein lysate according to the ratio of PMSF:RIPA=1:100; cells were added an equal volume of lysate to extract protein. The protein concentration was detected by BCA protein concentration detection kit, and the loading amount of 40 mg protein was calculated. Secondly, prepare 8-10% separating gel and stacking gel based on the molecular size of the target protein, soak the SDS-PAGE gel in the electrophoresis solution, add the denatured protein to the SDS-PAGE gel hole according to the loading amount, keep the pressure constant of 80V for electrophoretic separation. Transfer the membrane at a constant current of 120 mA, and the transfer time depends on the size of the protein. Blocked with 5% skim milk for 2 h. Wash off the blocking solution with tris-buffered saline containing 0.1% Tween-20 (TBST), dilute the antibodies with the primary antibody dilution solution according to the antibody dilution ratio in the antibody manual, and seal the membrane overnight at 4°C, the antibodies were as following *Hoxa5* (DF4123, Affinity Bioscience, Beijing, China), *Fam3a* (20588-1-AP, Proteintech, Chicago, IL, USA) and *Kat7* (ab70183, Abcam, UK). Wash the membranes with TBST, prepare the corresponding secondary antibody, and apply the membrane for 2 h at 37°C on a shaker. Lastly, the chemiluminescent solution was prepared, ECL luminescence, photographed, and integrated density values (IDVs) analysis was performed by Gelpro 32 software.

**FISH**

To investigate circRap1b localization in HT22 cells, FISH assays were carried out with *circRap1b* probe (5′-CCTTGAACAAACTGTACAGT-3′) as previously described 45

**Cell Transfections**

*CircRap1b* overexpression (circRap1b(+)) plasmids and its corresponding negative control plasmids were constructed using pCDH-CMV-MCS-EF1-Puro vector (Geneseed Biotech, Guangzhou, China); the plasmids of Hoxa5 and Fam3a overexpression (Hoxa5(+) and Fam3a(+))were synthesized and constructed (GenePharma, Shanghai, China); siRNA of *Hoxa5*, *Fam3a* and *Kat7* (*Hoxa5*(-), *Fam3a*(-) and *siKat7*) plasmids and their corresponding negative control (NC) plasmids were constructed by GeneChem (Shanghai, China); HT22-AIS cells were plated in 24-well plates. When the cell confluency reached 70%-80%, the above plasmids were transfected with the transfection reagent Lipofectamine 3000, and cells were screened by G428 or puromycin. The transfection efficiency was detected by quantitative Real-time PCR and Western blot.

**RNA Pull-Down**

The interaction between *circRap1b* and *Kat7* (or H3K14ac) protein was detected using Pierce magnetic RNA-protein pull-down kit (Thermo Fisher Scientific, USA) according to the instructions. The procedure of the assays was performed as previously described45. The antibodies used in assays were as follows: Anti-*Kat7* (ab70183, Abcam, UK) and H3K14ac antibody (ab82501, Abcam, UK).

**RIP Assays**

The EZ-Magna RNA-Binding Protein Immunoprecipitation Kit (Millipore, USA) was utilized to carry out the RIP assays following the manufacturer's protocol. The procedure of the assays was performed as previously described45. The antibodies used in assays were as follows: Anti-*Kat7* (ab70183, Abcam, UK), anti-IgG (Millipore, USA), anti-SNRNP70 (Millipore, USA)

**Flow Cytometry**

The apoptosis of HT22 cells was assessed by ApoScreen Annexin 7AAD/PE kit (Southern Biotech, USA). After the cells to be tested were trypsinized, washed with PBS and centrifuged twice, the refrigerated 10×Annexin V binding buffer was diluted to 1×Annexin V and placed on ice, and the cells were resuspended with 120 μl of 1×Annexin V to obtain the concentration of 1-106 cells/mL cell suspension. According to the manufacturer's instructions, cells were added with 10 μl of conjugated Annexin V-PE, mixed gently, and incubated at 2°C-8°C for 15 minutes in the dark. Subsequently, 10 μl of 7-AAD staining was added, and finally 380 μl of cold 1×Annexin V binding buffer was added. Lastly, Cells were analyzed by FACScan flow cytometry (BD Biosciences, USA) to determine the rate of apoptosis.

**Terminal deoxynucleotidyl transferase (TdT)-mediated dUTP-biotin nick end labeling (TUNEL) analysis**

As previously described42 that Neuronal apoptosis in the hippocampal CA1 region was assessed by terminal deoxynucleotide transferase (TdT) -mediated DUTP-biotin-notched-end labeling (TUNEL) according to the manufacturer's protocol of The One Step TUNEL Apoptosis Assay Kit (Beyotime, Jiangsu, China).

**Reporter Vectors Construction and Luciferase Reporter Assay**

As previously described46, similarly, promoter region -3000~0bp of Fam3a was amplified by PCR and cloned into the pmirGLO of Dual Luciferase Expression Vector (Promega, Madison, WI, USA) to construct wild-type and mutation-type luciferase reporter vectors (Generay Biotech Co., Shanghai, China). Then HEK293T cells were co-transfected with constructed reporter vectors and *Hoxa5*(+) (or empty vectors) plasmids (GeneChem, Shanghai, China) which containing mouse *Hoxa5* full-length sequence using Lipofectamine 3000. The relative luciferase activities were measured 48 h after co-transfection using a luciferase reporter gene assay kit (YPH, Beijing, China) following the manufacturer’s protocols.

**ChIP Assay**

Select the cells to be tested in the logarithmic growth phase, add 1% formaldehyde to a 10 cm cell culture dish, cross-link with tumor cells for 10 min at room temperature, add glycine at room temperature and place for 5 min. Cells were lysed with PMSF-containing lysis buffer, sonicated and incubated with nuclease for 20 minutes. The digestion of chromatin DNA was detected by agarose gel electrophoresis, and an appropriate amount of DNA was taken as a 2% Input positive control. Using *Hoxa5* antibody (DF4123, Affinity Bioscience, Beijing, China) (or histone methylated H3K14ac antibody (ab82501, Abcam, UK)) and negative control IgG antibody, respectively, incubated overnight at 4°C on a shaker. The spin column purifies the antibody-attached DNA. The target DNA products was amplified by PCR using the corresponding primers, and images were collected after agarose gel electrophoresis. The primers for each PCR set are provided in Table S2. For each PCR, the corresponding input was taken in parallel for PCR validation. Then, quantitative real-time PCR with SYBR Premix Ex Ta qII (Tli RNase H Plus) (Takara Bio) was used to quantitate the immunoprecipitated DNA from anti-H3K14ac, and the primers were provided in Table S3. The results were normalized to input and displayed as the relative enrichment of IgG.

**ChIRP**

First, an antisense DNA oligonucleotide probe specific for full-length circRap1b was designed. Briefly, chromatin is then prepared by cross-linking. For chemical cross-linking, cells were fixed with an appropriate amount of 1% formaldehyde in PBS for 10 min at room temperature. Quench with 0.125M glycine for 5 minutes after crosslinking. Nuclei were lysed in nucleolysis buffer on ice for 10 min followed by sonication until most of the chromatin was lysed and the DNA size ranged from 100-500 bp. Secondly, chromatin was to be in the stage of biotin probe hybridization and streptavidin-magnetic beads incubation. The beads-biotin probe-RNA-chromatin complex is captured by magnets. Finally, carefully aspirate the wash buffer into a pipette. Beads can be used in different elution protocols. RNA was extracted with Trizol and chloroform. The eluted RNA was subjected to quantitative reverse transcription PCR to detect enriched transcripts. DNA was extracted with phenol-chloroform-isoamyl ester and then precipitated with ethanol overnight at -80°C. The eluted DNA was subjected to quantitative PCR. The probes were provided in Table S4.

**Statistical Analysis**

All data in this study were analyzed by S GraphPad Prism v7.0 (GraphPad, CA, USA) and expressed as mean ± standard deviation (SD), and T-test or one-way analysis of variance (ANOVA) test was used between groups. If *P*<0.05, the difference was considered statistically significant.
