# Supplementary material for: Circular RNA Rap1b promotes Hoxa5 histone acetylation by recruiting Kat7 to inhibit neuronal apoptosis in acute ischemic stroke
Source: Research Square preprint supplement (doi:10.21203/rs.3.rs-1622225/v1), 2022-05-10
Supplement: Supplementary file 4 [file 987fe091c1b301035d699215.docx]

**Table S3. The primers of -1000 bp-TSS of Hoxa5 amplified with the DNA precipitated by H3K14ac to detect the percentage of relative to its corresponding input in qRT-PCR.**

| **Primers** | **Forward** | **Reverse** |
| --- | --- | --- |
| CDX2：–1000bp - –500bp | 5′-GTCTTTCGGAGCCCAGGAAA-3′ | 5′-GCTCTTAAACCACAGGCGTC-3′ |
| CDX2：–500bp - TSS | 5′-CGTTCACAAAAACAGAGCCGT-3′ | 5′-CTGGAGACTGGGCGCATC-3′ |
