# Supplementary material for: Circular RNA Rap1b promotes Hoxa5 histone acetylation by recruiting Kat7 to inhibit neuronal apoptosis in acute ischemic stroke
Source: Research Square preprint supplement (doi:10.21203/rs.3.rs-1622225/v1), 2022-05-10
Supplement: Supplementary file 5 [file ad58156a49212b9036dc977f.docx]

**Table S5. The primers for each PCR set in Chromatin immunoprecipitation assay, to confirm the existence of H3K14ac modification in Hoxa5 promoter region.**

| **Primers of CDX2 promoter region in Chromatin immunoprecipitation assay** | **Forward** | **Reverse** |
| --- | --- | --- |
| Hoxa5-PCR6: | 5′-ATGCAGAGGCCCTCATTTCC-3′ | 5′-ACCTGAAAACACTCCACTGGG-3′ |
| Hoxa5-PCR5: | 5′-AGGAGCCTGGATAGCGTCTT-3′ | 5′-CCTGTGGGCAGAAATGAGGT-3′ |
| Hoxa5-PCR4: | 5′- TTCAACCGCTACCTGACTCG-3′ | 5′- AGCCTTGGGGAGAAAACCTG-3′ |
| Hoxa5-PCR3: | 5′-GGTTGTGGGGGAAGAAGGAG-3′ | 5′-CTTGCGGCTCTCATGGTCTT-3′ |
| Hoxa5-PCR2: | 5′-TGAGATGCCAGGCCTCTAGT-3′ | 5′-CTCCGAGGCGAGGTCAAATT-3′ |
| Hoxa5-PCR1: | 5′-GCACTGTCCTTCATGCGTTC-3′ | 5′-GTTCAGTCGGACTCGAGCG-3′ |
