# Supplementary material for: Circular RNA Rap1b promotes Hoxa5 histone acetylation by recruiting Kat7 to inhibit neuronal apoptosis in acute ischemic stroke
Source: Research Square preprint supplement (doi:10.21203/rs.3.rs-1622225/v1), 2022-05-10
Supplement: Supplementary file 6 [file f4f356336bc7b9907d6e65b1.docx]

**Table S2.** **The primers for each PCR set in Chromatin immunoprecipitation assay, to confirm the binding sits for Hoxa5 in the promoter region of Fam3a.**

| **Primers** **in Chromatin immunoprecipitation assay** | **Forward** | **annealing temperatures** | **Reverse** | **annealing temperatures** | **products size** |
| --- | --- | --- | --- | --- | --- |
| PCR1 (Control-Fam3a) | 5′-CCAGCACCCACATAACAGCT-3′ | 60.3℃ | 5′-TGTCTGTGCACCACGTCTAT-3′ | 59.0℃ | 107bp |
| PCR2 (Fam3a-putative binding site) | 5′-TCATTTTGTTGTTGTTGCTGTTACT-3′ | 58.6℃ | 5′-CTTCCTCCTCCTCCTCCTCC-3′ | 60.1℃ | 115bp |
